# Supplementary material for: Different Lipid Signature in Fibroblasts of Long-Chain Fatty Acid Oxidation Disorders
Source: MDPI journal article supplement (doi:10.3390/cells10051239), 2021-05-18
Supplement: s1 [file s1]

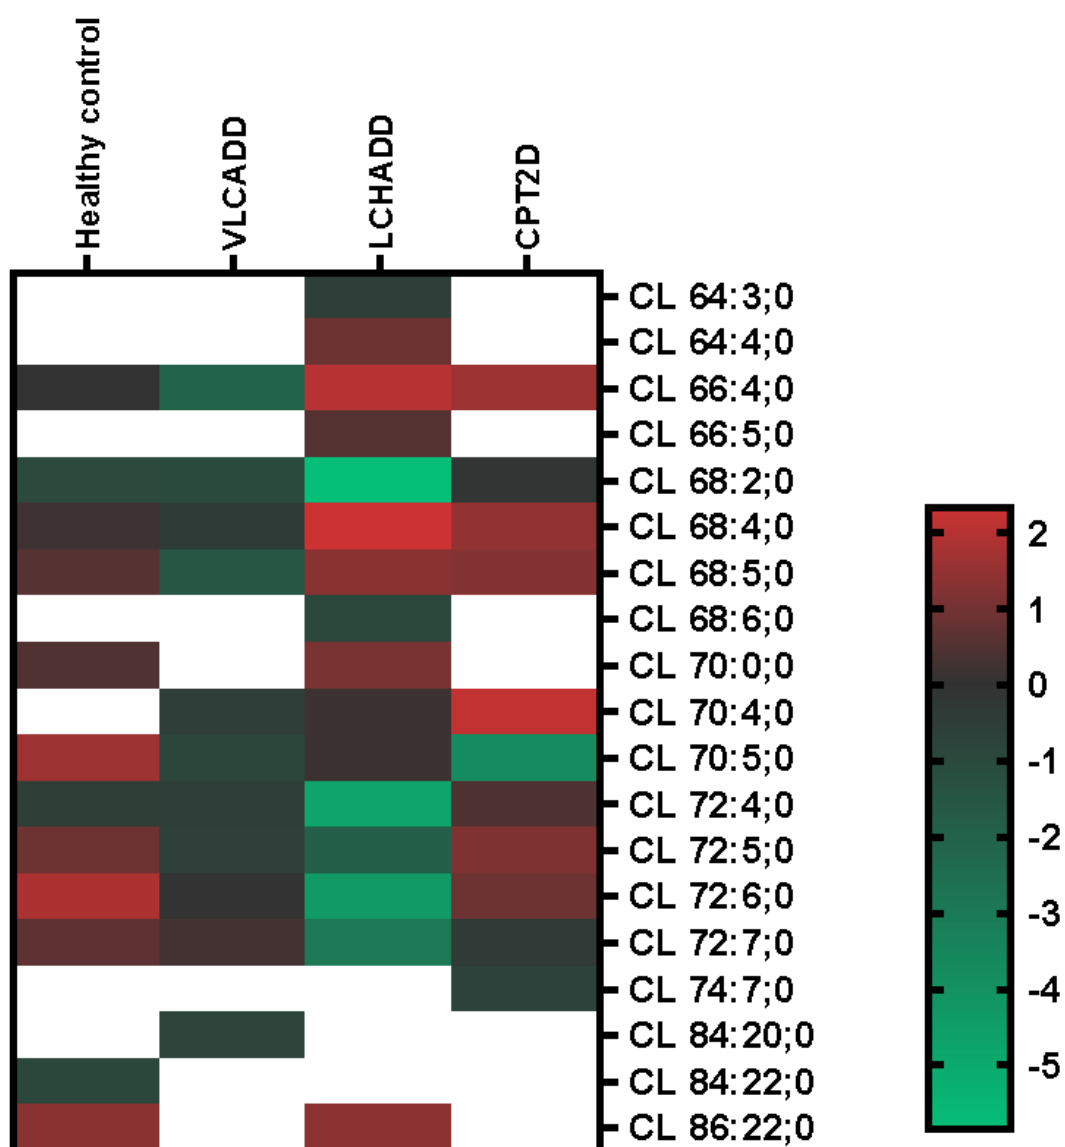

**Figure S1.** Heatmap of log2 transformed concentration of measured cardiolipin species in healthy controls and lc-FAOD.
